# Supplementary material for: Exploiting the Concept of Multivalency with 68Ga- and 89Zr-Labelled Fusarinine C-Minigastrin Bioconjugates for Targeting CCK2R Expression
Source: Contrast Media Mol Imaging. 2018 Apr 10;2018:3171794. doi: 10.1155/2018/3171794 (PMC5914118; doi:10.1155/2018/3171794)
Supplement: Supplementary Materials — This section contains a detailed description regarding the synthesis of the conjugates. Furthermore representative RP-HPLC chromatograms of 68Ga-labelled as well as radio-ITLC analysis of 89Zr-labelled probes are shown in Figure S1. The results of transchelation studies for 68Ga- and 89Zr-labelled conjugates are presented in Table S1. Figure S1: (A) radio-RP-HPLC chromatograms of 68Ga- and (B) radio-ITLC analysis of 89Zr-labelled mono- and multimeric conjugates. Table S1: transchelation studies of 68Ga and 89Zr mono- and multimers; data is expressed as percentage of peptide-associated radioactivity. [file 3171794.f1.docx]

Supplementary Materials for

Exploiting the concept of multivalency with 68Ga- and 89Zr-labelled Fusarinine C-minigastrin bioconjugates for targeting CCK2R expression

Dominik Summer1, Christine Rangger1,Maximilian Klingler1, Peter Laverman2, Gerben M. Franssen2, Elisabeth Lechner3, Thomas Orasch3, Hubertus Haas3, Elisabeth von Guggenberg1 and Clemens Decristoforo1,*

1Department of Nuclear Medicine, Medical University Innsbruck, Anichstrasse 35, A-6020 Innsbruck, Austria; 2Department of Radiology & Nuclear Medicine, Radboud University Medical Center, Geert Grooteplein Zuid 10, 6525 GA Nijmegen, The Netherlands; 3Division of Molecular Biology, Medical University Innsbruck, Innrain 80/82, A-6020 Innsbruck, Austria

***Corresponding Author**

E-mail: Clemens.Decristoforo@i-med.ac.at; Tel: +4351250480951; Fax: +435125046780951

**Precursor synthesis.**

**Peptide synthesis. [3-MP0-D-Glu1,desGlu2-6]-Ala-Tyr-Gly-Trp-Met-Asp-Phe-NH2 [MG11-SH].** The synthesis of the MG analogue was carried out following straight forward solid-phase peptide synthesis (SPPS) as previously described[1]. Rink amide MBHA resin (100–200 mesh, 62.5 µmol), *N*-terminal 9-Fluorenylmethoxycarbonyl (Fmoc) and side-chain protected amino acids (Boc-Trp, OtBu for Asp, Tyr and D-Glu) were purchased from Novabiochem (La Jolla, CA, USA). O-(7-azabenzotriazol-1-yl)-1,1,3,3-tetramethyluronium-hexafluorophosphate (HATU) and 1-Hydroxy-7-azabenzotriazole (HOAt) both from GenScript Corporation (Piscataway, NJ, USA) were used to activate the amino acids for conjugation and a threefold molar excess (187.5 μmol) was used to ensure coupling efficiency. For the introduction of a thiol functionality (3-mercaptopropionyl, 3-MP0)in the peptide 3-trithylsulfonylpropionic acid (Bachem, Bubendorf, Switzerland) was coupled in a final step. Simultaneous side chain deprotection and resin cleavage was carried out under acidic conditions (TFA/Triisopropylsilane/H2O (v/v/v; 95/2.5/2.5)). After precipitation of the crude product in ice-cold diethyl ether the peptide was dissolved in methanol and was purified by preparative RP-HPLC (gradient B; tR = 21.6 min) to give a white powder after freeze-drying. MG11-SH 37.6 mg [34.0 µmol, 54%]; analytical data: RP-HPLC tR = 12.8 min; m/z [M+Na]+ = 1128.23 [C51H64N10O14S2; exact mass: 1105.24 (calculated)].

**[Fe]Fusarinine C ([Fe]FSC).**FSC was obtained from fungal culture using a method described by Schrettl and co-workers[2]. Seeding an *Aspergillus fumigatus* mutant strain (ΔsidG), that lacks conversion of FSC to triacetylfusarinine C, in 200 mL iron-deficient *Aspergillus* minimal media (1x106 spores/mL) and incubating for 28 hours at 37°C and 200 rpm shaking resulted in secretion of the siderophore FSC by the fungal strain into the culture supernatant. After filtering off the biomass and adding 10 mL FeSO4 (100 mM) for iron saturation of FSC, the filtrate was subsequently loaded to a column containing Amberlite XAD18 beads (Dow Chemical Company, Philadelphia, PA, USA). [Fe]FSC was eluted from the column using methanol and after evaporation of the organic solvent ~ 100 mg of product was obtained as red brown coloured solid in > 90% purity. Analytical data: RP-HPLC tR = 8.1 min; m/z [M+H]+ = 780.86 [C33H51FeN6O12; exact mass: 779.63 (calculated)].

**Acetylation of [Fe]Fusarinine C.** [Fe]FSC (25 mg, 32 µmol) dissolved in 500 µL dry methanol was reacted with 10 µL of acetic anhydride for 5 min at room temperature (RT) under vigorously stirring. The resulting mixture of mono-, di- and triacetylfusarinine C was immediately purified *via* preparative RP-HPLC using gradient A to obtain *N*-acetylfusarinine C (mAc[Fe]FSC, tR = 17.8 min) and *N,N´*-diacetylfusarinine C (dAc[Fe]FSC, tR = 20.3 min) in high purity (> 95%) followed by lyophilization.

mAc[Fe]FSC 11.9 mg [14.5 µmol, 45%]; analytical data: RP-HPLC tR = 8.4 min; m/z [M+H]+ = 822.90 [C35H53FeN6O13; exact mass: 821.67 (calculated)].

dAc[Fe]FSC 8.2 mg [9.5 µmol, 30%]; analytical data: RP-HPLC tR = 8.8 min; m/z [M+H]+ = 864.95 [C37H55FeN6O14; exact mass: 863.71 (calculated)].

**Functionalization of FSC and acetylated FSC derivatives with maleimide linker.** [Fe]FSC (6.4 µmol), mAc[Fe]FSC (6.0 µmol) and dAc[Fe]FSC (5.8 µmol) were each dissolved in 500 µL dry dimethylformamide (DMF) and 3-(maleimido)propionic acid (mal) *N*-hydroxysuccinimide ester (Sigma-Aldrich Handels GmbH, Vienna, Austria) was added in 2-4 fold molar excess. After adding 1-3 equivalent of Hünig’s base the reactions were completed within 10 min at ambient temperature (analytical RP-HPLC: [Fe]FSC-(*N,N´,N´´*-(3-maleinimidopropionyl))3 = **[Fe]FSC-mal3** tR = 12.2 min; mAc[Fe]FSC-(*N´,N´´*-(3-maleinimidopropionyl))2 = **mAc[Fe]FSC-mal2** tR = 11.1 min; dAc[Fe]FSC-(*N´´*-(3-maleinimidopropionyl)) = **dAc[Fe]FSC-mal**tR = 10.4 min). Subsequently the organic solvent was evaporated, 5 mL of aqueous Na2EDTA (100 mM) was added to each vial and stirring was continued overnight. When analytical RP-HPLC analysis confirmed complete removal of iron the products were isolated by preparative RP-HPLC [gradient B: FSC-mal3 tR = 25.3 min; mAcFSC-mal2 tR = 22.8 min; dAcFSC-mal tR = 19.6 min] directly from the reaction solutions to give colourless solids after lyophilisation in high purity (> 98%).

FSC-mal3: 5.5 mg [4.7 µmol, 73%]; analytical data: RP-HPLC tR = 12.6 min; m/z [M+Na]+ = 1203.27 [C54H69N9O21; exact mass: 1180.17 (calculated)].

mAcFSC-mal2: 5.1 mg [4.8 µmol, 78%]; analytical data: RP-HPLC tR = 11.4 min; m/z [M+H]+ = 1072.21 [C49H66N8O19; exact mass: 1071.09 (calculated)].

dAcFSC-mal: 4.8 mg [5.0 µmol, 86%]; analytical data: RP-HPLC tR = 10.8 min; m/z [M+H]+ = 963.03 [C44H63N7O17; exact mass: 962.01 (calculated)].

**Conjugation of targeting vector(s).** For site specific conjugation of targeting peptide FSC-mal3 (0.85 µmol), mAcFSC-mal2 (0.93 µmol) and dAcFSC-mal (1.04 µmol) were each dissolved in phosphate buffered saline (PBS, pH 7.2) and the thiolated MG analogue (MG11-SH) was added in 1.5-4 fold molar excess. Conjugation was completed after 2 h continuous stirring at ambient temperature and the products were freeze-dried after isolation in high purity (>95%) *via* preparative RP-HPLC using gradient C (FSC-(mal-Met)3 tR = 22.9 min; mAcFSC-(mal-Met)2 tR = 20.6 min; dAcFSC-mal-Met tR = 18.7 min).

FSC-(mal-MG11)3 [=Trimer] 2.4 mg [0.53 µmol, 63%]; analytical data: RP-HPLC tR = 16.9 min; m/z [M+H]+ = 4496.65 [C207H261N39O63S6; exact mass: 4495.90 (calculated)].

mAcFSC-(mal-MG11)2 [=Dimer] 2.2 mg [0.67 µmol, 72%]; analytical data: RP-HPLC tR = 15.7 min; m/z [M+Na]+ = 3304.66 [C151H194N28O47S4; exact mass: 3281.58 (calculated)].

dAcFSC-mal-MG11 [=Monomer] 1.8 mg [0.87 µmol, 84%]; analytical data: RP-HPLC tR = 13.6 min; m/z [M+Na]+ = 2090.99 [C95H127N17O31S2; exact mass: 2067.25 (calculated)].

**References**

[1] Summer D, Grossrubatscher L, Petrik M, Michalcikova T, Novy Z, Rangger C, et al. Developing Targeted Hybrid Imaging Probes by Chelator Scaffolding. Bioconjug Chem 2017;28:1722–33. doi:10.1021/acs.bioconjchem.7b00182.

[2] Schrettl M, Bignell E, Kragl C, Sabiha Y, Loss O, Eisendle M, et al. Distinct roles for intra- and extracellular siderophores during Aspergillus fumigatus infection. PLoS Pathog 2007;3:1195–207. doi:10.1371/journal.ppat.0030128.


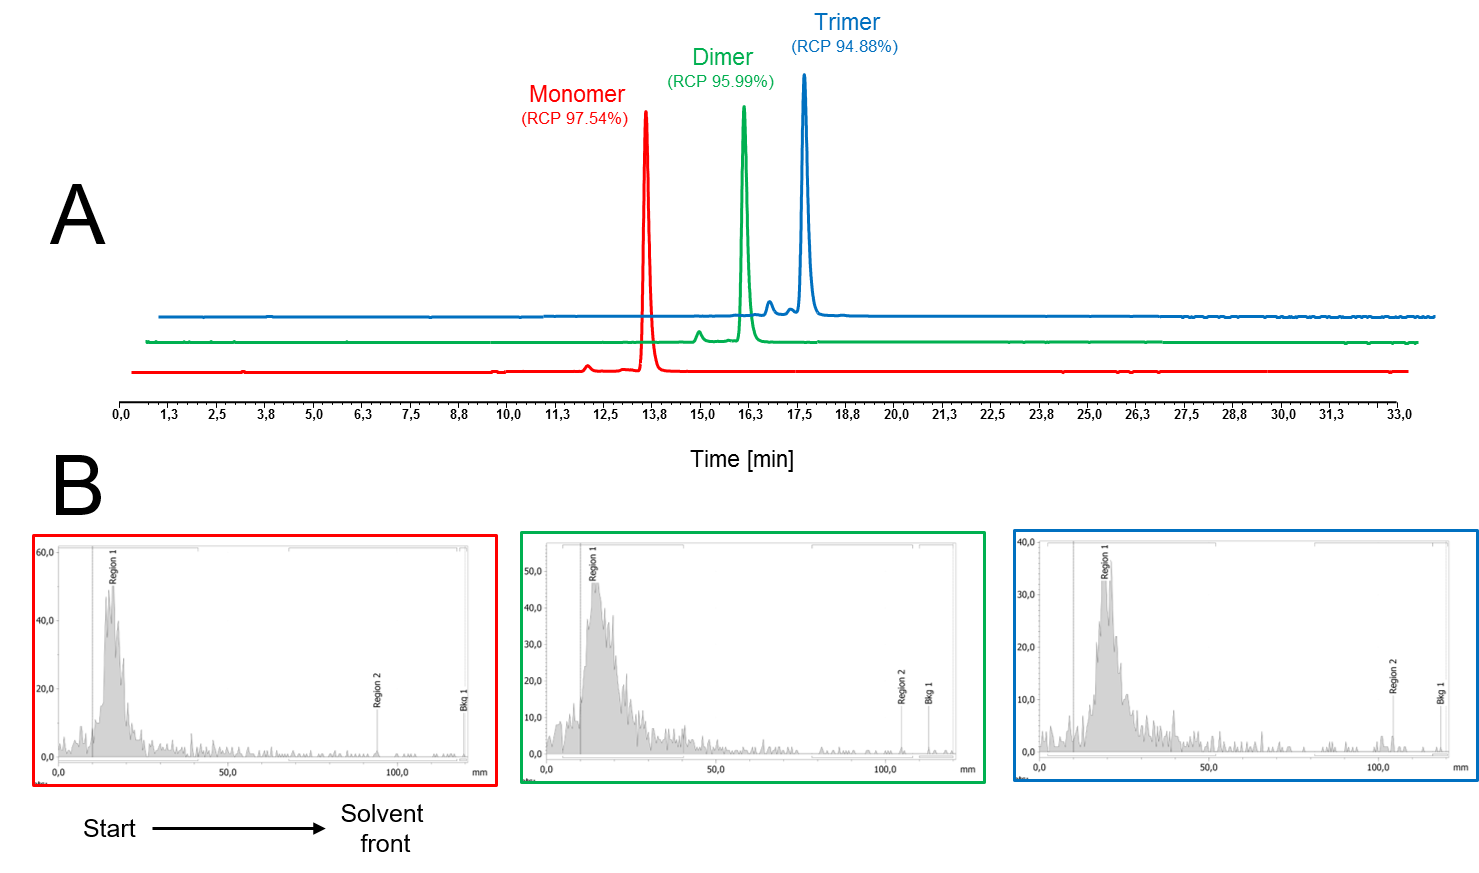


Figure S1: (A) *radio*-RP-HPLC chromatograms of 68Ga- and (B) *radio*-ITLC analysis of 89Zr-labelled mono and multimeric conjugates

**Table S1:** Trans-chelation studies of 68Ga- and 89Zr-mono- and multimers; data is expressed as percentage of peptide-associated radioactivity

|  |  | 68Ga-labelled | | | 89Zr-labelled | | |
| --- | --- | --- | --- | --- | --- | --- | --- |
|  | Incubation Time | Monomer | Dimer | Trimer | Monomer | Dimer | Trimer |
| PBS | 1 h | 99.9 ± 0.1 | 99.9 ± 0.1 | 99.8 ± 0.1 | 99.7 ± 0.1 | 99.5 ± 0.1 | 99.8 ± 0.1 |
| 2 h | 99.9 ± 0.1 | 99.9 ± 0.1 | 99.9 ± 0.1 | 99.5 ± 0.1 | 99.5 ± 0.1 | 99.7 ± 0.1 |
| 4 h | 99.8 ± 0.2 | 99.9 ± 0.1 | 99.9 ± 0.1 | 99.3 ± 0.1 | 99.5 ± 0.1 | 99.6 ± 0.1 |
| 7 d | - | - | - | 99.6 ± 0.1 | 99.8 ± 0.1 | 99.9 ± 0.1 |
| EDTA | 1 h | 98.3 ± 0.1 | 98.2 ± 0.1 | 98.5 ± 0.1 | 99.5 ± 0.1 | 99.4 ± 0.1 | 99.5 ± 0.1 |
| 2 h | 97.9 ± 0.1 | 97.7 ± 0.1 | 97.8 ± 0.1 | 99.0 ± 0.1 | 99.2 ± 0.1 | 99.3 ± 0.1 |
| 4 h | 97.0 ± 0.5 | 96.3 ± 0.3 | 96.7 ± 0.1 | 98.5 ± 0.1 | 98.7 ± 0.1 | 95.8 ± 0.3 |
| 7 d | - | - | - | 85.8 ± 0.2 | 79.3 ± 0.9 | 83.4 ± 0.8 |
| DTPA | 1 h | 99.2 ± 0.1 | 98.9 ± 0.1 | 99.0 ± 0.1 | 99.0 ± 0.1 | 99.0 ± 0.1 | 99.2 ± 0.1 |
| 2 h | 99.0 ± 0.1 | 98.8 ± 0.1 | 99.0 ± 0.2 | 99.0 ± 0.2 | 98.9 ± 0.1 | 98.9 ± 0.2 |
| 4 h | 98.5 ± 0.1 | 98.6 ± 0.1 | 98.7 ± 0.1 | 98.5 ± 0.2 | 98.8 ± 0.1 | 98.8 ± 0.1 |
| 7 d | - | - | - | 99.1 ± 0.1 | 99.3 ± 0.1 | 99.7 ± 0.1 |
| FeCl3 | 1 h | 98.0 ± 0.3 | 99.2 ± 0.1 | 98.9 ± 0.2 | 98.7 ± 0.1 | 98.7 ± 0.1 | 98.7 ± 0.1 |
| 2 h | 97.3 ± 0.1 | 99.1 ± 0.1 | 97.9 ± 0.3 | 98.7 ± 0.1 | 98.6 ± 0.2 | 98.4 ± 0.1 |
| 4 h | 95.6 ± 0.9 | 98.6 ± 0.2 | 97.2 ± 0.4 | 98.1 ± 0.4 | 98.4 ± 0.1 | 98.3 ± 0.1 |
| 7 d | - | - | - | 97.9 ± 0.1 | 98.7 ± 0.1 | 98.9 ± 0.1 |
| Human Serum | 1 h | 99.9 ± 0.1 | 99.6 ± 0.1 | 99.5 ± 0.1 | 98.6 ± 0.2 | 98.7 ± 0.1 | 98.6 ± 0.1 |
| 2 h | 99.8 ± 0.1 | 99.6 ± 0.1 | 99.4 ± 0.1 | 98.5 ± 0.1 | 98.7 ± 0.2 | 98.6 ± 0.2 |
| 4 h | 99.7 ± 0.1 | 99.7 ± 0.1 | 99.3 ± 0.2 | 98.5 ± 0.1 | 98.6 ± 0.2 | 98.7 ± 0.2 |
| 7 d | - | - | - | 96.9 ± 0.1 | 97.8 ± 0.1 | 96.8 ± 0.3 |

Data are presented as average ± maximum error (n=2)
